1 Long-range regulatory effects of  
2 Neandertal DNA in modern humans

3  
4 Danat Yermakovich<sup>1</sup>, Vasili Pankratov<sup>1</sup>, Urmo Võsa<sup>1</sup>, Bayazit Yunusbayev<sup>1,2</sup>, Estonian Biobank  
5 Research Team<sup>1</sup>, Michael Dannemann<sup>1,\*</sup>

6  
7 <sup>1</sup> Institute of Genomics, University of Tartu, Tartu, Estonia

8 <sup>2</sup> ITMO University, SCAMT Institute, Saint-Petersburg, Russia

9 \* Correspondence: michael.dannemann@ut.ee

## 10 Abstract

11 The admixture between modern humans and Neandertals has resulted in ~2% of the  
12 genomes of present-day non-Africans still being composed of Neandertal DNA. Association  
13 studies have shown that introgressed DNA still significantly influences skin and hair traits,  
14 immunity and behavioral phenotypes in people today. Several of the phenotype-associated  
15 archaic variants had links to regulatory effects as well. In general, analyses of allele-specific  
16 expression, regulatory sequence composition and cis-eQTL have demonstrated a significant  
17 contribution of this introgressed DNA to the transcriptomic landscape in people today. However,  
18 little is known about the impact of Neandertal DNA on trans-eQTLs - long-range regulatory  
19 effects that have been shown to explain ~20% of expression variation.

20 Here we used blood eQTL results from >30,000 individuals from eQTLGen Consortium.  
21 The cohort size allowed for a robust identification of trans-eQTLs and in addition enabled  
22 quantifying the role of transcription factors (TF) in mediating long-range regulatory effects. In our  
23 study we used this information to (i) annotate trans-eQTLs that are linked to Neandertal variants  
24 and (ii) predict long-range regulatory effects that are induced by Neandertal DNA by screening  
25 for the predicted target genes of TFs that are cis-eQTLs linked to Neandertal variants. We show  
26 that both trans-eQTL-associated Neandertal variants and those predicted to have long-range  
27 regulatory effects affect genes in genomic regions devoid of Neandertal DNA. In addition, both  
28 types of variants included candidates for local adaptation and show associations with  
29 autoimmune disorders, a severe Covid-19 phenotype, blood cell type composition and  
30 anthropometric measures.

31 Our results suggest that the regulatory reach of Neandertal DNA goes beyond the 40%  
32 of genomic sequence that it still covers in present-day non-Africans and that via this mechanism  
33 Neandertal DNA additionally influences the phenotypic variation in people today.

## 34 Introduction

35           The genome sequences of archaic humans such as Neandertals and Denisovans have  
36 shown that modern humans admixed with both archaic groups ~55,000 years ago [1–3]. As a  
37 result of these admixtures ~2% of the genomes of present-day non-Africans are composed of  
38 Neandertal DNA and an additional 2-5% of the genomes of Oceanian are derived from  
39 Denisovans [4]. Several studies have used information from genome-wide association studies to  
40 link archaic DNA to their potential phenotypic effects. These studies have shown that  
41 Neandertal DNA significantly influences skin and hair traits, immunity and behavioral  
42 phenotypes [5–8]. Many of the phenotype-associated archaic variants have been associated  
43 with regulatory effects as well, including several instances of Neandertal DNA with additional  
44 evidence for local adaptation [9,10]. In general, it has been demonstrated that both Neandertal  
45 and Denisovan DNA have significantly shaped the transcriptomic landscape in people today  
46 [8,11–14]. The analyses of the regulatory impact of introgressed archaic DNA have been based  
47 on cis-eQTLs, allele-specific expression and presence of archaic variants in regulatory  
48 sequence motifs. At the same time it has been demonstrated that regulatory sequences in  
49 modern human genomes also have been subject to negative selection against archaic DNA  
50 [15,16]. Both observations indicate that one major mechanism through which archaic DNA is  
51 influencing modern human phenotype variation is by its impact on gene expression regulation.  
52 These observations are perhaps not surprising given that the heritability of many phenotypes  
53 including disease is often mediated by gene expression [17].

54           However, previous studies have also shown that among eQTLs, cis-eQTLs only explain  
55 ~6% of gene expression variation [18]. In contrast, trans-eQTLs, i.e., long-distance regulatory  
56 effects, have been shown to explain with ~20% a substantially larger proportion of gene  
57 expression differences. The underlying mechanisms of the long-range impact of trans-eQTLs  
58 include transcription factor (TF) activation and chromatin-chromatin interactions that can  
59 modulate the expression of large sets of genes across the genome [19,20]. Given the polygenic  
60 nature of many complex traits and the growing evidence that many of those traits are regulated  
61 by complex gene expression networks, trans-eQTLs and their ability to impact many genes  
62 simultaneously might provide an important mechanism in understanding the molecular bases of  
63 polygenic phenotypes [21].

64           Large consortia like GTEx have revolutionized our understanding of the genetic basis of  
65 gene expression regulation [22]. Thousands of cis-eQTLs have been annotated in a diverse set  
66 of 49 tissues. However, little is known about the genetic bases of long-range regulatory effects.  
67 In fact, only 163 trans-eQTLs were detected in GTEx across all 49 tissues combined. This

68 discrepancy between the number of cis and trans-eQTLs can be explained by both the smaller  
69 effect sizes of trans-eQTLs compared to cis-eQTLs and the substantially larger number of  
70 variant-gene pairs tested in a genome-wide trans-eQTL screen, that also require higher  
71 statistical significance thresholds to account for multiple testing [18]. Among the 163 trans-  
72 eQTLs none of the underlying genetic variants show evidence of being of Neandertal ancestry.  
73 However, the limited number of annotated trans-eQTLs in GTEx makes it difficult to evaluate the  
74 significance of this observation. Recently, the eQTLGen consortium has published blood  
75 expression data from 31,684 samples, a dataset with a substantially increased association  
76 power compared to other existing datasets [23]. The authors provide a genome-wide cis-eQTL  
77 maps and a trans-eQTL screen for 10,317 trait-associated variants and show that 47% of  
78 significant trans-eQTLs could be linked to direct and indirect transcription factor (TF) activity.

79 In this study we particularly focussed on the trans-eQTL screen in eQTLGen and  
80 explored it for significant trans-eQTLs associated with introgressed Neandertal DNA. We  
81 investigated associated Neandertal variants for their molecular effects. Using this information,  
82 we attempted to reconstruct the underlying long-range regulatory mechanism with a particular  
83 focus on the role of TFs in facilitating these effects. Furthermore, we scanned GTEx and  
84 eQTLGen Neandertal-DNA-associated cis-eQTLs for those linked to TFs expression and used  
85 this information to predict potential trans-eQTL effects. Using TF target gene information, we  
86 then explored the potential genomic range and targets of TFs of eQTLGen and predicted trans-  
87 eQTLs that are associated with Neandertal DNA. We then sought to establish a connection of  
88 long-range eQTL variants to various disease and non-disease phenotypes. Finally, we tested for  
89 evidence for positive selection for our candidates in present-day human populations.

## 90 Materials and methods

### 91 *eQTL datasets*

92 We downloaded cis and trans-eQTL summary statistics from eQTLGen [23] and GTEx  
93 [22] [v8]. We annotated significant cis and trans-eQTLs based on an FDR cutoff of 0.05.

94

### 95 *Annotation of introgressed Neandertal variants*

96 We identified Neandertal variants in the eQTLGen, GTEx and UK and Japan Biobank  
97 cohorts based on a list of previously annotated introgressed Neandertal marker variants,  
98 referred to as aSNPs [24]. These aSNPs have been annotated in the 1,000 genomes project  
99 dataset (v5a) [24,25] and were defined based on the following conditions: (i) one allele is fixed  
100 in the African Yoruba population (ii) the second allele is present in a homozygous state in at  
101 least in one of the genomes of the Altai Neandertal, Vindjia Neandertal or Denisovan [2,3,26]  
102 and (iii) the allele in (ii) being present in at least one non-African 1,000 Genomes individual. We  
103 detected 616,647 autosomal aSNPs in the 1,000 Genomes and 151,388 aSNPs in 15 Papuans  
104 from the Simons Genome Diversity Project (SGDP) cohort [27]. In addition, we inferred archaic  
105 haplotypes for candidate trans-eQTL aSNPs as genomic regions between the left- and right-  
106 most aSNPs showing linkage disequilibrium of  $r^2 > 0.8$  with the candidate aSNP in the 1,000  
107 Genomes dataset. We required these inferred haplotypes to overlap with previously annotated  
108 haplotypes that have been shown to exceed a length that is not consistent with incomplete  
109 lineage sorting (ILS), a genomic phenomenon that can also result in allele sharing properties  
110 described in (i-iii).

111

### 112 *Sequence similarity of inferred archaic haplotypes with archaic humans*

113 We compared the sequences of haplotypes in each archaic candidate region in all 1,000  
114 Genomes individuals and the 15 SGDP Papuans by calculating the nucleotide differences to the  
115 genome sequences of each the Altai Neandertal, Vindjia Neandertal and Denisovan. We  
116 restricted this analysis to all biallelic positions for which the genomes of the three archaic  
117 humans showed a homozygous genotype.

118

### 119 *Putative molecular consequences*

120 We functionally annotated aSNPs associated with haplotypes for the 13 trans-eQTL  
121 candidates based on computational and experimental information. First, we used ENSEMBL's  
122 variant effect predictor and RegulomeDB to assign potential molecular consequences of the 446  
123 aSNPs residing on the candidate haplotypes (RegulomeDB; [28], VEP, [29]). Information on

124 aSNPs with predicted regulatory or protein sequence changing effects can be found in Tables  
125 S1 and S2. In addition, we leveraged information from two studies that tested for expression-  
126 modulating effects of aSNPs using massively parallel reporter assays [30,31]. These variants  
127 included 5,353 high-frequency Neandertal variants, from which 2,548 showed potential as cis-  
128 regulatory elements (CREs) and 292 altered the regulatory potential (emVar) in one study [31]  
129 while the other included 613 variants (including 290 aSNPs) with 327 CREs and 20 emVars. We  
130 intersected our set of 446 aSNPs with the set of reported variants (Table S3, S4).

131

### 132 *TF prediction databases*

133 We leveraged TF target gene prediction information from seven databases. The target  
134 gene information in these databases is based on computational prediction algorithms (MotifMap  
135 [32], Human TFTG [33], JASPAR [34], TRANSFAC predicted [35]) and experimental information  
136 (ENCODE [36], CHEA [37], TRANSFAC curated [35]). The numbers of evaluated TFs and  
137 predicted targets varies substantially between these databases (Table S5). In order to ensure  
138 comparability between information from these databases we equalized gene names from all  
139 databases to common GeneSymbols, collapsed duplexes and limited the analysis to protein  
140 coding genes. Human TFs without target gene information in any of these databases were  
141 annotated based on AnimalTFDB3.0 [38].

142

### 143 *Phenotype databases*

144 We extracted phenotypic information for both trans-eQTL associated aSNPs in  
145 eQTLGen and predicted ones from GTEx cis-eQTL associated TFs from EBI GWAS catalog  
146 (<https://www.ebi.ac.uk/gwas/>) [39], Immunobase, a blood cell traits study [40] and the Biobank  
147 Japan for associations with candidate aSNPs (Table S6, S7). We considered all phenotype  
148 associations with  $P < 5 \times 10^{-8}$ .

149

### 150 *Definition of archaic deserts*

151 We used information on shared archaic deserts of Neandertal and Denisovan  
152 introgression from the studies of Sankararaman et al. and Vernot et al. [1,4]. We considered all  
153 autosomal deserts reported by both studies and collapsed overlapping deserts into one by using  
154 the range of the combined regions. That resulted in five deserts that were defined by the  
155 following hg19 coordinates: chr1:99Mb-114.9Mb, chr3:76.5Mb-90.5Mb, chr7:108Mb-128Mb,  
156 chr8:54.5Mb-65.4Mb and chr13:49Mb-61Mb. We annotated genes as desert genes if they were  
157 located within the desert's borders.

158

159 *Transcription factor enrichment analysis for hub trans-eQTLs and archaic desert genes*

160 We tested for an over-representation of TF target genes sets within the sets of genes for  
161 each of the two hub trans-eQTL candidates (*rs72973711* and *rs13098911/rs13063635*) and  
162 archaic desert genes using prediction information from all seven TF databases. We performed  
163 two-sided Fisher's Exact tests for all combinations and retrieved Odds ratios and P values. For  
164 these analyses we used all available protein-coding target genes for a given database as a  
165 background gene set. We corrected the obtained P values for multiple testing using the  
166 Benjamini–Hochberg method.

167

168 *Evidence for natural selection acting on trans-eQTL aSNPs*

169 To estimate changes in the allele frequency over the last 500 generations and to test  
170 whether these changes might have happened under natural selection we applied CLUES [41] to  
171 16 significant trans-eQTL aSNPs. CLUES for each SNP was run as in Marnetto et al. [42].  
172 Briefly, we started with building local trees by applying Relate (version 1.1.4)[43] to whole  
173 genome sequences of 2,420 Estonian Biobank participants (dataset is described in [44,45]).  
174 When running Relate for tree building we used the strict callability mask, recombination map  
175 and the reconstructed human ancestral genome all generated based on the 1,000 Genomes  
176 Project (GRCh37), a mutation rate of  $1.25 \times 10^{-8}$  and an effective population size of 30,000. Next,  
177 we extracted subtrees corresponding to a subset of 1,800 individuals by removing individuals  
178 that were related (relatives up to 3rd degree), PCA or singleton count outliers and individuals  
179 with excessive IBD sharing ( $\geq 166.2$  cM) with 2 or more other individuals in the dataset. This  
180 step was implemented to run CLUES on a more homogeneous dataset and to reduce run time.  
181 Coalescent rate over time for the Estonian population needed for CLUES was estimated based  
182 on 100 randomly sampled individuals. When running CLUES we extracted the local tree with the  
183 SNP of interest and re-sampled its branch length 200 times. We then removed the first 100  
184 samples and took every 5<sup>th</sup> tree (20 in total) for importance sampling. If a trans-eQTL aSNP was  
185 not passing the applied mask, was not mapped to a local tree or was flipped by the Relate  
186 algorithm we used a proxy aSNP with the highest  $r^2$  to the trans-eQTL choosing the physically  
187 closest SNP if there were more than one with the same  $r^2$  value. To account for the variation in  
188 the results coming from the uncertainty in branch length estimation we ran the analysis (starting  
189 from sampling branch length) twice for each aSNP and averaged frequencies and log likelihood  
190 ratios. For the three pairs of SNPs in strong linkage we ran CLUES for each SNPs and then  
191 averaged the estimates within each pair. In addition we also ran CLUES as described above for

192 2,829 (out of 3,853) trans-eQTLs being present on our local trees and having MAF  $\geq$  5% in  
193 2,420 Estonians once for each SNP.



## 194 Results

### 195 *Trans-eQTLs in eQTLGen with a link to Neandertal variants*

196 A total of 3,853 of the 10,317 trait-associated SNPs that have been assessed for trans-  
197 eQTL effects in eQTLGen showed a significant long-range regulatory effect on one or multiple  
198 genes [23]. We found that 16 of these 3,853 genetic variants were linked to SNPs that are of  
199 likely Neandertal ancestry. We will refer to these SNPs as aSNPs throughout the manuscript.  
200 Such aSNPs have previously been annotated in 1,000 Genomes Project individuals based (i) on  
201 their allele-sharing patterns of variants that are absent in the African Yoruba population and  
202 found in both Neandertals and non-Africans and (ii) their link to a haplotype that is not  
203 compatible with incomplete lineage sorting, another genomic phenomena that can lead to a  
204 similar sharing pattern (Materials and methods). Among the 16 Neandertal-linked trans-eQTLs  
205 were 3 pairs of SNPs, showing high levels of linkage disequilibrium among them ( $r^2 > 0.5$   
206 between the two aSNPs for all three pairs, Materials and methods). We have collapsed these  
207 three pairs, reducing the numbers of independent Neandertal trans-eQTL associations to 13  
208 (Table S8). Ten of these trans-eQTLs were associated with a significantly altered expression of  
209 one target gene, while the three other trans-eQTLs were linked to expression changes of  
210 multiple genes with 2, 27 and 34 target genes respectively. Notably, the archaic alleles for the  
211 two trans-eQTLs with 27 and 34 target genes were associated with directional impacts on  
212 expression (Table S8, Figure 2A-B). In the presence of the archaic allele at the given loci, 67%  
213 (18/27,  $P=0.12$ , Binomial Test) of genes associated with *rs72973711* subjected to an  
214 expression-increasing effect, while 78% (28/34,  $P=2.0 \times 10^{-4}$ , Binomial Test) of genes related to  
215 *rs13098911/rs13063635* region show lower expression levels.

216

### 217 *Archaic source of introgression for trans-eQTL aSNPs*

218 With the close genetic relationship of Neandertals and Denisovans, it is possible that  
219 trans-eQTL aSNPs represent introgressed haplotypes from either of the two archaic groups. To  
220 assess the likely archaic source population we first defined introgressed haplotype based on the  
221 region that other aSNPs span that are in LD of  $r^2 > 0.8$  with a given trans-eQTL aSNP and then  
222 analyzed the sequence similarity of those haplotypes to the genome sequences of both  
223 Neandertals and the Denisovan (Materials and methods). We found that haplotypes for all 13  
224 trans-eQTL candidates showed a closer sequence relationship with Neandertals (Figure S1).  
225 Six of the haplotypes showed a similar sequence to both the Altai and Vindija Neandertal  
226 individuals, six haplotypes showed a closer relationship to the Vindija individual while one had a

227 more Altai Neandertal-like sequence. This observation is consistent with a closer genomic  
228 sequence relationship of the introgressing Neandertal population with the Vindija individual [2].

229         There are two potential factors that could lead to a mis-classification of Denisovan  
230 haplotypes as Neandertal: 1) incomplete lineage sorting among archaic humans; 2) the lower  
231 sequences similarity between the sequenced Denisovan and the introgressing Denisovan  
232 population compared to the sequenced and introgressing Neandertals [1]. We therefore  
233 explored two additional features of our 13 candidate haplotypes to further explore their origin.  
234 First, we studied the presence of these haplotypes in different present-day populations. We  
235 found that all haplotypes were present (frequency>1%) in the majority of European and South  
236 Asian 1,000 Genomes populations (Figure 3). Similarly, all but two haplotypes could also be  
237 detected in East Asians. With Denisovan DNA in present-day people being mostly restricted to  
238 Oceanians and low levels in some Asians [46], the wide spread of candidate haplotypes in  
239 diverse Eurasian populations is another indicator of their Neandertal origin.

240         Finally, we have explored the genome sequences of 16 Papuan individuals from the  
241 Simons Genome Diversity Project (SGDP) for evidence of additional Denisovan haplotypes in  
242 the 13 trans-eQTL regions. We found evidence for archaic haplotypes in three regions and no  
243 evidence for any difference between the aSNP composition of those haplotypes compared to  
244 the reconstructed haplotypes in the 1,000 Genomes dataset.

245         These results suggest that archaic haplotypes for all our trans-eQTL aSNPs are of likely  
246 Neandertal origin.

247

#### 248 *Impact of trans-eQTL associated aSNP on gene expression regulation and protein* 249 *sequence*

250         The sparse trans-eQTL screen provided by eQTLGen prohibits a robust assessment of  
251 whether the archaic variants at a given locus are the likely driver of the trans-eQTL signal or  
252 whether any non-archaic variation in linkage disequilibrium is showing substantially stronger  
253 association results. And even in the case of archaic variants in a given region showing the top  
254 association wouldn't necessarily imply causality [47]. Another factor that is particularly  
255 pronounced for introgressed DNA from archaic humans is their extended haplotype structure.  
256 Due to the time of admixture ~55,000 years ago Neandertal variants are found on haplotypes  
257 with tens or even hundreds of aSNPs in high LD, spanning over several tens of kilobases [48].  
258 In order to (a) provide additional evidence that trans-eQTL aSNPs or aSNPs in LD with them  
259 show regulatory potential, and (b) narrow down the aSNPs on a given haplotype that are the  
260 most likely candidates for such regulatory effects we used computational effect prediction tools

261 and experimental data from reporter assays to annotate aSNPs on Neandertal haplotypes that  
262 are linked to our 13 trans-eQTL candidates.

263 We first used ENSEMBL's variant effect predictor (VEP) [29] to annotate the effects of  
264 trans-eQTL-associated aSNPs on the gene and protein sequence as well as on regulatory  
265 regions. We found that among the 446 aSNPs that are associated with archaic haplotypes of  
266 our 13 trans-eQTL candidates were 130 variants with a potential regulatory function, including  
267 10 aSNPs that modify the TF binding site (TFBS) sequence, 14 that are located in 3' and 5'  
268 UTRs and 106 aSNPs in other regulatory regions. In general, 11 Neandertal haplotypes  
269 associated with our 13 candidates carry at least one of these putative regulatory aSNPs,  
270 providing additional evidence for links between trans-eQTL associated aSNPs and different  
271 molecular processes (Table S1). In addition, we found four aSNPs that altered the amino acid  
272 sequence, suggesting that some of the molecular consequences of the trans-eQTL-associated  
273 Neandertal variants also affect the protein sequence. Three of those aSNPs were linked to the  
274 same trans-eQTL haplotype associated with *rs2066807/rs2066819* on chromosome 12. The  
275 aSNPs associated with that haplotype modified the protein sequence of *ANKRD52*  
276 (*rs59626664*) and *STAT2* (*rs2066807*) as well as the start codon for *COQ10A* (*rs60542959*)  
277 (Figure 1A-B). An additional aSNP (*rs13079478*) linked to the trans-eQTL on chromosome 3  
278 (*rs13063635/rs13098911*) affected the amino acid sequence of *FYCO1*.

279 The results from VEP were consistent with those we obtained from RegulomeDB [28]. A  
280 total of 42 of the 446 trans-eQTL Neandertal haplotype aSNPs were categorized as 'likely to  
281 affect binding', 17 of which with an additional link to the expression of a target gene. These 17  
282 aSNPs were associated with four haplotypes that were also classified to carry putative  
283 regulatory variants using VEP. An additional 46 aSNPs associated with these four haplotypes  
284 and four additional trans-eQTL candidate regions showed evidence for binding affinity as well,  
285 but to a lesser degree than the 42 above mentioned aSNPs (Table S2).

286 Finally, we explored two studies that have tested both a set of cis-regulatory aSNPs and  
287 aSNPs that have been associated with a severe Covid-19 phenotype, respectively for their  
288 expression-modulating potential in an immune cell line [30,31]. A total of 151 of the 446 aSNPs  
289 that were associated with our trans-eQTL haplotypes have been included in the experimental  
290 setup by those studies. The 151 aSNPs were distributed across six of our 13 candidate  
291 haplotypes with 126 of them being linked aSNPs on chromosome 3 (*rs13063635/rs13098911*)  
292 and an additional 20 of them were linked to aSNPs of the trans-eQTL on chromosome 12  
293 (*rs2066807/rs2066819*, Figure 1B). Sixty-nine of the 151 tested aSNPs have been assigned as  
294 active cis-regulatory variants in the tested cell lines and for six of them the archaic allele has

295 been shown to also significantly alter the expression level. Three of these SNPs fall onto the  
296 archaic haplotypes on chromosomes 3 and 12, respectively (Table S3, S4).

297

### 298 *Regulatory mechanism of trans-eQTL aSNPs*

299 Next, we sought to explore whether we can reconstruct the putative mechanisms  
300 through which the long-range regulatory effects of our trans-eQTLs are modulated. It has been  
301 shown that in eQTLGen up to 47% of the trans-eQTL activity can be explained by direct and  
302 indirect regulation involving a TF and additional co-regulatory effects [23]. Indeed, three of our  
303 13 candidates have been assigned to such mechanisms by the study, including one of the  
304 trans-eQTL with the largest number of target genes (tag aSNPs *rs13098911/rs13063635*),  
305 which have been linked to be co-regulated by *CXCR6* and *CCR3*, two receptors that play a role  
306 in immune response among other functions [49,50]. Another candidate trans-eQTL (aSNP:  
307 *rs16997087*) associated with the modified expression of *ITGB3BP* has been linked to a complex  
308 indirect mechanism involving a co-regulation via *MARCOD2*, which itself has been modulated  
309 by a TF that is co-regulated with a gene that is in close proximity to the trans-eQTL aSNP  
310 (Table S9). Finally, two aSNPs in high LD (*rs2066807/rs2066819*) have been linked to an  
311 indirect regulation of the TF *STAT6* and a subsequent effect on the reported trans-eQTL genes.

312 In an attempt to further uncover potential regulatory mechanisms for our Neandertal-  
313 linked trans-eQTL candidates, we explored TF cis-eQTLs that were associated with aSNPs  
314 residing on trans-eQTL candidate loci haplotypes. We then tested for a direct connection  
315 between the TF and the trans-eQTL target genes using TF target prediction information from  
316 seven databases (CHEA, ENCODE, Human TFTG, JASPAR, MotifMap, TRANSFAC curated  
317 and predicted; Materials and methods). These databases report TF target information from  
318 different techniques, including computational binding motif-based approaches or experimental  
319 data such as Chip-Seq to generate their TF target predictions. The number of TFs with available  
320 information varies widely between databases and lies between 111 (JASPAR) and 671 (Human  
321 TF-TG). In total these databases provide target gene information for 866 TFs, which is almost  
322 half of the 1,791 annotated TF in the human genome (Materials and methods). Due to the  
323 different algorithms the sensitivity between these databases is expected to differ as well. In total  
324 we found 17 TFs that were in testable distance for the eQTLGen cis-eQTL screen from our 13  
325 trans-eQTL candidates. Four of these TFs (*KLF3*, *BLZF1*, *STAT2* and *STAT6*) showed a  
326 significant cis-eQTL association (referred to as cTFs from hereon) with aSNPs that were also  
327 associated with three trans-eQTL candidates (*KLF3*: *rs6531656*, *BLZF1*:  
328 *rs10919070/rs10919071* and *STAT2/STAT6*: *rs2066807/rs2066819*, FDR<0.05, Table S10).

329 Unfortunately none of the prediction databases provided target gene information for *KLF3* or  
330 *BLZF1*, therefore not allowing us to assess whether trans-eQTL genes were putatively targeted  
331 by these cTFs. However, for our third locus (*rs2066807/rs2066819*) we found evidence for a  
332 potential regulatory link between both cTFs *STAT2* and *STAT6* and *IFI16* - one of the two trans-  
333 eQTL genes (ENCODE, Figure 1D). This observation is also consistent with the inference of  
334 Vösa & Claringbould et al. who report *STAT6* as being an indirectly affected TF. Nevertheless,  
335 using the TF target prediction data provides additional complexity. First, *IFI16* is a target of both  
336 *STAT2* and *STAT6*. Second, *STAT2* and *STAT6* are also predicted to target each other  
337 (TRANSFAC and MotifMap). Notably, *STAT2* showed significantly lower expression in the  
338 presence of the archaic alleles ( $P=3.3 \times 10^{-122}$ , Z-Score=-23.5, Table S8), while *STAT6* showed  
339 the opposite regulatory direction ( $P=2.6 \times 10^{-7}$ , Z-Score=5.2). Both TFs have been shown to  
340 function as transcription activators. The lower expression of *IFI16* in the presence of the archaic  
341 alleles suggests that a direct regulation by *STAT2* is more consistent with these observations.  
342 However, the potential connectedness between these three genes would therefore also be  
343 compatible with other more complex interaction scenarios.

344 In addition, trans-eQTL loci with large numbers of affected genes provide a second  
345 inroad to test for potential links with TFs that might be involved in the regulatory network  
346 underlying the trans-eQTL. Two of our candidates showed large numbers of trans-eQTL genes  
347 (27 and 34 trans-eQTL genes of *rs72973711* and *rs13098911/rs13063635*). Again, using  
348 information from the seven TF target prediction databases we tested for an enrichment of these  
349 two gene sets among the predicted target genes of TFs. The 27 genes linked to *rs72973711*  
350 showed the strongest enrichment results among predicted target genes of *ISX* ( $P=9.42 \times 10^{-5}$ ,  
351 FDR=0.20, OR=5.4, Human TF-TG, Figure 2C). Unfortunately, *ISX* is only tested in one of the  
352 seven databases, hindering us from collecting additional evidence for the robustness of this  
353 inference. A second notable TF was *NANOG*, which was tested in three databases (ENCODE,  
354 CHEA, Human TF-TG) and showed a consistently larger overlap of predicted targets and the 27  
355 trans-eQTL genes (ORs>1 for all tested databases, Materials and methods). The results in two  
356 of those databases showed significant enrichment P values as well (OR=4.4,  $P=0.02$  for Human  
357 TF-TG and OR=3.5,  $P=0.002$  for ENCODE). Trans-eQTL genes linked to the second multi-gene  
358 trans-eQTL *rs13098911/rs13063635* showed the most significant overlap with target genes of  
359 *STAT6* (OR=12.3,  $P=5.7 \times 10^{-6}$ , FDR=0.01, CHEA) - the only result with FDR<0.05 among all  
360 tested sets of TFs. Target gene information for *STAT6* was also available in three other  
361 prediction databases (curated version of TRANSFAC, MotifMap, Human TF-TG) but showed no  
362 significant enrichment results in any of those ( $P>0.5$  in all and OR>1 in 2/3 databases). However,



363 it was notable to observe the recurrent link to *STAT6* for this trans-eQTL gene set, a TF which  
364 was already shown to be a relevant component for the regulatory mechanism of the previously  
365 discussed trans-eQTL candidates associated with *rs2066807/rs2066819*.

366

### 367 *Prediction of Neandertal-linked trans-eQTL effects*

368 The limited number of SNPs tested for trans-eQTL effects in eQTLGen and the reduced  
369 power to test for trans-eQTLs in smaller datasets like GTEx prevents us from directly  
370 associating Neandertal variants with long-range regulatory effects on a genome-wide scale.  
371 However, the observation of the involvement of TFs to initiate and facilitate long-range  
372 regulatory effects allows us to use this information to predict potential genomic regulatory reach  
373 of Neandertal DNA. In this study, we focussed on one particular mechanism: the effect of  
374 Neandertal variants on nearby TFs expression and on the predicted targets of the affected TF.  
375 Overall, up to 9% of the trans-eQTL effects observed by Vösa & Claringbould et al. can be  
376 linked to this particular mechanism, with another 38% involving TFs at some other stage in the  
377 regulatory chain. In order to identify TFs that show evidence for a regulatory link to nearby  
378 Neandertal DNA we first scanned the eQTLGen dataset for cTFs that were linked to aSNPs. We  
379 found that a staggering 441 of the 1301 tested TFs showed a significant cis-eQTL (FDR<0.05,  
380 Table S11) that was linked to an aSNP. That number was in stark contrast to aSNP-linked cTFs  
381 in GTEx (v8, Materials and methods). Here, we found that across 49 diverse tissues a total of  
382 65 TFs were aSNPs with significant cis-eQTL in at least one tissue (FDR<0.05, Table S12).  
383 Most of these TFs were found to be significantly regulated in only one (46 TFs) or two (11 TFs)  
384 tissues. Conversely, five cTFs were found in more than 6 tissues. *ZNF143* and *ZNF189* showed  
385 significant cis-eQTLs in 17 and 16 tissues respectively, including diverse sets of tissues such as  
386 the heart, arteries, blood, skin, adipose tissues, intestine and the brain (Table S12). For both  
387 genes we observed a consistently lower expression in the presence of the archaic allele. Among  
388 the other three TFs with cis-eQTL in multiple tissues was *STAT2* with a total of seven tissues  
389 with cis-eQTLs linked to aSNPs. The affected tissues with such regulatory effects included two  
390 adipose tissues, liver, skin, nerve, cerebellar and artery tissues, with five of these tissues  
391 showing a higher expression of *STAT2* in the presence of the archaic alleles (Figure 1E). In  
392 general, at least one significantly Neandertal-linked cTF was found in 40 of the 49 tissues. The  
393 tissue with the most active TFs was skeletal muscle (8 TFs) followed by lung, adipose  
394 (subcutaneous), skin, thyroid (all 7 TFs) and blood (6TFs).

395 Thirtythree of the 65 Neandertal-linked GTEx cTFs overlapped with those found in  
396 eQTLGen. The overlapping cTFs showed significantly larger effect sizes among eQTLGen cTFs

397 (Mann-Whitney-U test,  $P=3.3 \times 10^{-7}$ ) with 28 of them being in the top half in effect size, and 13 of  
398 those even within the top 10%. In general, the correlation of effect sizes between GTEx and  
399 eQTLGen was high (Spearman's  $\rho=0.66$ ,  $P=1.3 \times 10^{-13}$ ) and highly consistent (78.0% showed the  
400 same expression direction, Figure 4). The eQTLGen data also included data from GTEx blood  
401 expression data. When removing GTEx blood cTFs from the analysis the correlation remains  
402 comparable (Spearman's  $\rho=0.66$ ,  $P=2.8 \times 10^{-13}$ , 79% shared expression direction), suggesting  
403 that the correlation is not primarily driven by the partially shared data in eQTLGen and GTEx.

404 These results are consistent with the higher statistical power in eQTLGen to detect more  
405 subtle regulatory effects than is possible in a smaller cohort like GTEx. The results also suggest  
406 that Neandertal DNA can be linked to regulatory effects on a substantial number of TFs and  
407 therefore potentially be involved in a wide range of downstream regulatory effects.

#### 408 The regulatory reach of eQTLGen and predicted trans-eQTLs

409 We next analyzed predicted target genes of Neandertal-linked cTFs in eQTLGen and  
410 GTEx. Target gene prediction information across seven prediction databases was available for  
411 30 of 65 GTEx cTFs and 185 of 441 cTFs in eQTLGen (Table S5). However, prediction  
412 information varied widely between databases (Table S13). For example, while the 30 GTEx  
413 cTFs were present in at least one of the seven prediction databases, cTFs in individual  
414 databases ranged from just four (TRANSFAC predicted targets) to 20 (Human TF-TG). A similar  
415 discrepancy was also observable for prediction information of cTFs in eQTLGen (Table S5).  
416 Consequently, also the number of predicted target genes for these sets of TFs showed  
417 substantial differences between databases and ranged between 7,330 and 17,323 for eQTLGen  
418 TFs and 1,648 and 16,696 for GTEx TFs.

419 Interestingly, some of the predicted target genes were located in genomic regions that  
420 have previously been reported to be devoid of Neandertal and Denisovan ancestry [1,4]. Among  
421 the 257 protein-coding genes located in the five autosomal deserts reported by both studies 239  
422 were within the predicted target gene sets. All those genes were predicted to be regulated by at  
423 least one of the 185 eQTLGen cTFs in at least one database (Table S5). Also, the smaller set of  
424 30 GTEx cTFs was predicted to affect almost all (237/239) of those desert genes (Figure 5C).  
425 Two genes that have been associated with modern human-specific biology, *FOXP2* and  
426 *ROBO2*, were among the cTF targets [51,52]. Our results suggest that they might nevertheless  
427 be influenced by introgressed archaic DNA. However, it remains unclear how many of the  
428 predicted target genes are in fact regulated by these TFs and in which tissue or developmental  
429 stage these effects are relevant. We found one empirical case in eQTLGen where the trans-

430 eQTL gene *TCEA1* (associated with aSNP *rs4805834*) is located within a desert on  
431 chromosome 8 54.5-65.4MB. Another example was *UTP14A*, which was linked to trans-eQTL  
432 aSNP *rs12603526*. *UTP14A* is located on chromosome X within one of the multiple deserts on  
433 that chromosome (Figure 5D).

434 Both predicted targets of cTFs and trans-eQTL information in eQTLGen suggest that  
435 genes in deserts are not out of regulatory reach of Neandertal DNA. However, we were seeking  
436 to further assess the significance of the role of Neandertal DNA on desert genes. For this  
437 purpose, we approached this question from a different angle. We first scanned for TFs with  
438 predicted target genes that were over-represented in archaic deserts. We again leveraged  
439 information from the seven TF target prediction database to screen for such instances. If  
440 prediction information for a TF was available for more than one database, we required all odds  
441 ratios to be larger than 1 and at least two enrichment P values (Fisher's exact test) to be smaller  
442 than 0.05, at least one of which remaining at that significance after multiple testing correction.  
443 TFs with prediction information in only one database were required to have a more restricted  
444 FDR threshold of  $10^{-4}$ . We found 18 TFs passing that criterion, 17 in GTEx and 14 in eQTLGen.  
445 Interestingly, this list included with *ASXL1*, *JUN*, *PRDM5* and *SMARCB1* - four Neandertal-  
446 linked cTFs. All four candidates were cTFs in eQTLGen, with *JUN* and *PRDM5* also being cTFs  
447 in GTEx (*JUN*: Brain cortex; *PRDM5*: Frontal cortex BA9 and spleen). While predicted target  
448 genes for *JUN* and *SMARCB1* were evenly distributed across all five deserts, targets for *ASXL1*  
449 and *PRDM5* showed substantial differences in their prevalence between individual deserts  
450 (Figure 5A-B). A total of 31 of the 34 desert target genes for *ASXL1* were found in two desert  
451 regions (24 of 97 desert genes on chr1 and 7 of the 45 genes in desert on chr13) and all 28  
452 *PRDM5* desert target genes were found on chromosome 7 (18 of 68) and 8 (10 of 35).

453

#### 454 *The impact of Neandertal-linked trans-eQTLs on modern human phenotype variation*

455 Furthermore, we sought to investigate links between eQTLGen and predicted trans-  
456 eQTL aSNPs and their potential phenotypic effects. The initial selection of SNPs tested for  
457 trans-eQTL effects by Vösa & Claringbould et al. included variants that showed significant  
458 associations in GWAS ( $P < 5 \times 10^{-8}$ ) in the EBI GWAS catalog [39], Immunobase and a blood trait  
459 GWAS [40] (Materials and methods). By this selection a link between these trans-eQTLs and  
460 phenotypic effects has already been established. We have explored these databases and  
461 additional association data from Biobank Japan to annotate significant phenotype associations  
462 for our Neandertal-linked trans-eQTL aSNPs (Table S6). We found that most of our candidates  
463 (7/13) were showing associations with various blood cell composition measures, including the



464 two trans-eQTLs with 27 and 33 target genes, respectively. These results are consistent with  
465 the fact that most of the tested and trans-eQTL-associated variants by Võsa & Claringbould et  
466 al. were linked to this group of phenotypes. However, one of these two multi-gene trans-eQTLs  
467 (*rs13098911/rs13063635*) showed associations not related to blood cells. Two of those  
468 associations showed a decreased risk for mouth ulcers and other dental issues. The archaic  
469 alleles for this risk locus have previously also related to increased risks for a severe Covid-19  
470 phenotype [53] and Celiac disease, an autoimmune disorder, where dietary gluten intake  
471 causes inflammation in the small intestine at gluten intake [54]. Notably, another trans-eQTL  
472 locus (*rs2066807/rs2066819*) was also associated with an increased risk in autoimmune  
473 disease. The archaic alleles at that locus were more prevalent in individuals with psoriasis. And  
474 also this locus was not limited to one association, but showed multiple additional phenotype  
475 links, including multiple anthropometric measures related to increased height and body mass  
476 and several pulmonary functional measurements. Two other trans-eQTL loci (aSNPs  
477 *rs17331332* and *rs7811653*) were associated with anthropometric and pulmonary measures as  
478 well. The directional effects for the phenotypes included increasing and decreasing height,  
479 weight and pulmonary measures. The remaining phenotype associations for Neandertal-linked  
480 trans-eQTL variants were related to increased risk for colorectal cancer (*rs12603526*),  
481 electrocardiogram measurements (*rs10919070/rs10919071*), hypospadias (*rs7811653*) and  
482 brain connectivity measurements (*rs16997087*).

483 In order to evaluate this observation in a dataset that was not pre-selected for GWAS-  
484 associated variation we explored whether aSNPs linked to any of the 65 GTEx cTFs showed  
485 phenotype associations ( $P < 5 \times 10^{-8}$ ) in any of the previously used cohorts as well. We found that  
486 14 cTF loci showed aSNPs with significant associations, including the region on chromosome  
487 12 (cis-eQTL TF: *STAT2*) which was also detected as a trans-eQTL in eQTLGen and described  
488 in the previous section (Tables S5, S6). The aSNPs for seven additional cTFs (*ATOH7*,  
489 *CCDC88A*, *FOXC1*, *HOXA13*, *SMARCA4*, *ZNF592* and *ZKSCAN4*) showed associations with  
490 height measures. This phenotype was also among the ones associated with the *STAT2* aSNPs  
491 on chromosome 12 as well (Figure 1F), making this by far the most frequently associated  
492 phenotype among TF-associated aSNPs. Other non-height phenotype associations included  
493 cholesterol levels, coronary artery disease, neuroma, breast cancer, grip strength, body fat  
494 measures, varicose veins, and abnormal red blood cell volumes.

495

496 *Evidence for local adaptation*

497 One of the candidate haplotypes on chromosome 12 overlaps a genomic region that  
498 previously has been linked to a Neandertal DNA with signals of positive selection in Papuans  
499 [55]. We therefore re-evaluated the frequency distribution of this and all other eQTLGen trans-  
500 eQTL candidate regions in present-day non-African populations for evidence of positive  
501 selection. We quantified the frequency of our candidate aSNPs and compared it to the  
502 frequency distribution of all detected aSNPs within 15 Eurasian populations from the 1,000  
503 Genomes cohort and 16 SGDP Papuans [25,27]. As previously reported by Mendez et al. we  
504 found that while the region on chromosome 12 showed frequencies of <10% in all 1,000  
505 Genomes Eurasians, the frequency was, with 57%, substantially higher in Papuans (Figure 1C,  
506 3). This frequency in Papuans puts these aSNPs within the top 5% of all aSNPs in that  
507 population. This observation is even more remarkable for a Neandertal haplotype, given that in  
508 Papuans many aSNPs are derived from Denisovans and expected to have an on average  
509 higher frequency compared to their Neandertal counterparts. In total we found that eight other  
510 candidate regions reached frequencies in at least one population that were among the top 5%  
511 among aSNPs in the given population. Particular outliers here were the regions associated with  
512 the trans-eQTL aSNPs *rs13063635/rs13098911* and *rs6531656*, which were found at archaic  
513 allele frequencies in the top 1% among aSNPs (34-38% in South Asians for  
514 *rs13063635/rs13098911* and 43-51% in three East Asian populations for *rs6531656*).

515 Additionally, we sought to explore whether any of the 13 trans-eQTL candidate aSNPs  
516 show evidence for recent directional allele frequency changes, possibly as a result of selective  
517 pressures. For that we used a dataset of around 2,400 whole genome sequences from the  
518 Estonian Biobank as by leveraging such a big sample from a rather homogeneous population  
519 we can gain power in detecting frequency changes in the recent past. We first generated local  
520 genealogical trees for this dataset using Relate [43] and then applied CLUES [41], an  
521 approximate full-likelihood method for inferring allele frequency trajectories to our trans-eQTL  
522 candidate aSNPs (Materials and methods). This analysis revealed trans-eQTL aSNPs that  
523 experienced either an increase or a decrease in the frequency of the Neandertal allele over the  
524 last 500 generations. Most of those changes are characterized by low log likelihood ratios  
525 (logLR) suggesting little evidence for rejecting neutrality (Figure 6, Table S14). Nevertheless,  
526 two trans-eQTL candidates, that also showed exceptional frequencies in some populations  
527 before (*rs13063635/rs13098911* and *rs2066807/rs2066819*), were predicted to have increased  
528 in frequency by more than two-fold over the last 500 generations in the population ancestral to

529 Estonians with a strong support for non-neutrality. The corresponding average logLRs for each  
530 of the two trans-eQTL candidates aSNP pairs were high compared to ~2,900 significant trans-  
531 eQTL SNPs from eQTLGen, reaching the 93<sup>rd</sup> (*rs13063635/rs13098911* and 97<sup>th</sup> percentile for  
532 only *rs13063635*) and 97<sup>th</sup> (*rs2066807/rs2066819*) percentile of the trans-eQTL SNP logLR  
533 distribution (Materials and methods).

534 Both analysis on the frequencies of trans-eQTL-associated aSNPs in populations and  
535 recent frequency changes in Estonian genomes suggest that particularly the candidate  
536 haplotypes on chromosomes 3 and 12 show signals of positive selection.

537

## 538 Discussion

539 In this study we explored the eQTLGen blood gene expression dataset for evidence of  
540 associations between introgressed Neandertal DNA and gene expression variation. The sample  
541 size of more than 30,000 individuals for this dataset provides the statistical power to annotate  
542 trans-eQTLs, long-range regulatory SNP associations, which are typically smaller in effect size  
543 compared to cis-eQTLs, and harder to confidently identify in smaller cohorts such as GTEx.  
544 Among the ~10,000 preselected and phenotype-associated SNPs tested for trans-eQTL effects  
545 in eQTLGen were 16 that had a link to 13 unique Neandertal haplotypes. Several studies have  
546 previously shown evidence for a significant contribution of Neandertal DNA to gene expression  
547 regulation including a directional allele-specific expression in the brain and testes [12], an  
548 impact on regulatory genomic motifs [13,16] and larger number of significant cis-eQTL  
549 associations compared to frequency-matched non-archaic variants [8,11]. However, the  
550 sparseness of the set of tested trans-eQTL SNPs prevents the application of previously used  
551 methods to robustly assess whether the proportion of Neandertal associations among all  
552 significant trans-eQTLs is unexpectedly higher or lower. Another shortcoming of the sparse  
553 coverage of the trans-eQTL screen is the lack of information on the association strength of  
554 genetic variation that is in linkage disequilibrium with the tested SNPs. It is conceivable that  
555 some of our aSNP associations are in high linkage disequilibrium with non-archaic variants that  
556 show even stronger effect sizes. While the strongest effect size doesn't necessarily translate to  
557 actual molecular consequences [47] it likely represents a higher probability for causality.

558 Nevertheless, we show that archaic haplotypes linked to 11 of our 13 trans-eQTL aSNPs  
559 are carrying aSNPs that alter regulatory sequences. One of those haplotypes is located on  
560 chromosome 12 and linked to the trans-eQTL aSNPs *rs2066807/rs2066819*. Other aSNPs  
561 linked to this haplotype and the trans-eQTL aSNPs on chromosome 3  
562 (*rs13063635/rs13098911*) showed in addition to their computationally identified links to modify  
563 regulatory sequences also expression changing effects, as determined in reporter assays in an  
564 immune cell line. Cis-eQTL data in eQTLGen and GTEx as well as previous CRISPR  
565 experiments [31] associate the variants on chromosome 12 also with expression-modulating  
566 effects of *STAT2*. This observation is particularly relevant given that one of the two trans-eQTL  
567 genes associated with the trans-eQTL aSNPs on chromosome 12, *IFI16*, is linked to the same  
568 haplotype and a predicted target of *STAT2*. We found multiple additional instances where our  
569 trans-eQTL aSNPs were cis-eQTLs of TFs as well.

570 Vösa & Claringbould et al have demonstrated that a substantial amount of trans-eQTLs  
571 can be traced back to direct or indirect effect on TFs that can, in turn, affect the expression of

572 the genes in distal loci [23]. In this study we explored what implications such TF-related  
573 processes have in the context of introgressed Neandertal DNA. We focussed on one specific  
574 mechanism where Neandertal variant has a cis-regulatory effect on local TF and determined  
575 which putative target genes of this TF could be under distal effect from the same cis-regulatory  
576 variant We identified 65 such cTFs across various tissues in GTEx with aSNP cis-eQTL  
577 associations. Tissues with most such cis-eQTLs were skeletal muscle (8 cTFs), lung, adipose  
578 (subcutaneous), skin, thyroid (all 7 cTFs) and blood (6 cTFs). Based on the fossil record  
579 previous studies presented evidence for differences in skeletal features and fat distribution  
580 between Neandertals and modern humans [56]. Furthermore, it has repeatedly been shown that  
581 introgressed Neandertal DNA significantly influences skin and hair traits [5–7]. Some of these  
582 studies have also demonstrated that Neandertal DNA showed an over-proportional number of  
583 associations with behavioral traits such as sleep [5–7,57], which are partially controlled by  
584 hormones produced in the thyroid. Our results may indicate that some of these phenotypic  
585 effects and differences may be linked to regulatory networks involving TFs in related tissues,  
586 like adipose tissue, skeletal muscle and skin. We then explored seven TF target gene prediction  
587 databases and found target gene information for 30 of the 65 GTEx cTFs and 185 of 441  
588 eQTLGen cTFs (Table S5). The number of predicted target genes across these databases with  
589 17,610 and 17,807 in GTEx and eQTLGen respectively comprised a large fraction of the  
590 transcriptome. Among these predicted target genes were more than 90% locate in genomic  
591 regions that have been shown to be devoid of Neandertal and Denisovan introgressed DNA. In  
592 addition, we show that among TFs that show an enrichment of their predicted target gene  
593 among genes in these archaic deserts were four TFs that show significant cis-eQTLs with  
594 aSNPs. Two of these TFs that were found in GTEx show their significant cis-eQTLs in brain  
595 tissues. This is particularly notable given that genes in these deserts have previously been  
596 shown to be enriched for brain-expressed genes [1]. This expression information for desert  
597 genes has previously been attributed to biological systems that might have differed between  
598 modern and archaic humans. Our results imply that the assumption of genes in these regions  
599 not being influenced by archaic DNA may be too simplified and that while only ~40% of the  
600 Neandertal genome is still recoverable in people today, its reach across the genome is likely  
601 beyond that percentage.

602 We note that the different prediction algorithms we used in our study are based on  
603 different prediction strategies, including computational frameworks and inferences based on  
604 experimental data. Consequently, the accuracy of these algorithms varies [58] and is hard to  
605 exactly quantify as it often remains unclear in which tissue or developmental stage the predicted

606 effects are functionally relevant. Nevertheless, our results indicate the potential regulatory reach  
607 of introgressed Neandertal DNA just by this one mechanism alone. And given that this  
608 mechanism is likely to explain substantially less trans-eQTLs when compared to indirect TF-  
609 mediated mechanisms [23] it is likely that the long-distance reach of Neandertal DNA goes way  
610 beyond what we have shown in our study. It remains challenging to computationally reconstruct  
611 regulatory mechanisms and therefore fully reconstruct the regulatory role of Neandertal DNA  
612 through its interaction with TFs. However, the results of our study and other previous work that  
613 investigated the impact of Neandertal DNA on the modification of TF binding motif sequences  
614 [59,60] have demonstrated the importance of studying the interaction of Neandertal DNA and  
615 TF activity in the quest to complete the picture of the impact of Neandertal introgression on the  
616 transcriptomic landscape of people today.

617 Finally, we explored trans-eQTL loci in eQTLGen and GTEx cTF loci that are linked to  
618 introgressed Neandertal DNA for phenotype associations with their corresponding aSNPs in  
619 various GWAS cohorts. Eight of the 13 trans-eQTL loci showed associations with blood cell type  
620 measures. The only other group of phenotypes with more than one locus linked to it were  
621 autoimmune diseases and height, each having two loci linked to it (Table S6). A total of 13 of  
622 the 65 GTEx cTF loci showed significant phenotype associations, too (Table S7). Notably,  
623 seven of these loci had associations with height and other body measures. Another four loci  
624 showed links to blood cell type composition. No other phenotype had associations with more  
625 than one of the 13 cTF loci. Given that trans-eQTL SNPs that were tested in eQTLGen were  
626 selected based on preexisting phenotype associations it remains unclear how representative  
627 these results are. However, given that blood cell type composition and height were also the  
628 most prevalent groups with associations to cTF loci suggests that particularly these groups of  
629 phenotypes may be linked to TF activation in the context of Neandertal introgression. We note  
630 that given the biases that allele frequencies introduce to association studies with gene  
631 expression and phenotypes and that the number of significant genetic loci highly varies  
632 between phenotypes will likely influence these observations. Consequently, it is hard to quantify  
633 whether these observations represent a significant deviation from the expectation given these  
634 factors. Nevertheless, it is intriguing to observe that highly polygenic phenotypes such as height  
635 were often linked to regulatory activity of TFs who themselves have the ability to influence  
636 expression levels of large sets of genes and therefore represent a polygenic equivalent on the  
637 transcriptomic level. Another observation that is noteworthy in that context is that aSNPs for  
638 eight of the 13 trans-eQTL loci in eQTLGen are found at frequencies that have reached the top  
639 5% among all Neandertal variants in at least one 1,000 Genomes population. And while this

640 observation is again not surprising given the elevated detection power in eQTL studies that  
641 comes with higher allele frequencies it is still informative to observe the regulatory network that  
642 is linked to these putative candidates for adaptive introgression. Here, particularly the trans-  
643 eQTLs associated with *rs13063635/rs13098911* and *rs2066807/rs2066819* stood out. Both sets  
644 of aSNPs showed both exceptionally high frequencies in some present-day populations and  
645 evidence for a more than two-fold recent increase in frequency in a European population. Both  
646 candidates also had associations with an increased risk of autoimmune disorders, consistent  
647 with an increase of the prevalence of such disorders in recent human evolution [61]. Our results  
648 suggest that Neandertal DNA may have contributed to that process.

649         In our study we provide new insights into the regulatory activity of Neandertal DNA, its  
650 potential phenotypic consequences and its role in recent human evolution. Future studies with  
651 genome-wide trans-eQTL information for various tissue types will help to refine and complete  
652 the impact of Neandertal DNA on the transcriptomic landscape of present-day people and help  
653 to decipher regulatory mechanisms that are modulated by introgressed DNA.



654 Figures

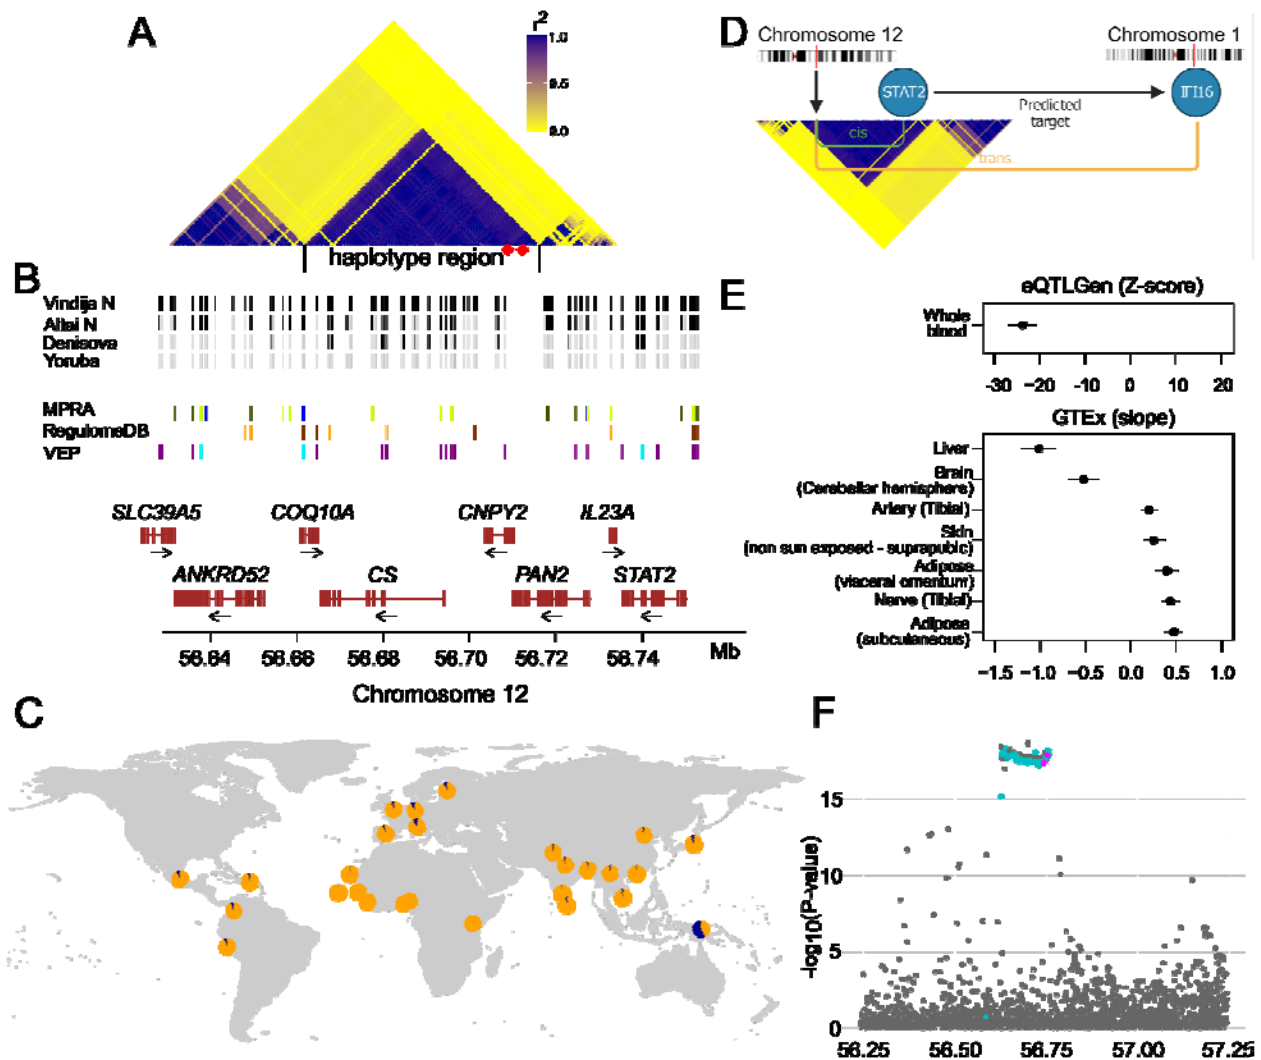

655  
656

**Figure 1: Neandertal-linked regulatory effect modulated by *STAT2***

657 **(A)** Linkage disequilibrium plot showing  $r^2$  for aSNP surrounding *rs2066807/rs2066819* (location  
658 highlighted in red) on chromosome 12 in the 1,000 Genomes dataset. Inferred haplotype region  
659 encompassing aSNPs with  $r^2 > 0.8$  is shown below LD plot (chr12:56,627,300-56,753,822). **(B)**  
660 Each bar represents an aSNP within the inferred Neandertal haplotype on chromosome 12 (A).  
661 Upper part of the panel shows genotypes across these aSNPs in the Vindija and Altai  
662 Neandertals, the Denisovan and the Yoruba 1,000 Genomes population (hg19  
663 references=black, alternative=light gray and heterozygous=gray). Middle part of the panel  
664 displays molecular inferences for aSNPs based on massively parallel reporter assay information  
665 (tested = dark green, cis regulatory activity = light green, expression modulating = blue),  
666 RegulomeDB (likely to affect binding and linked to expression of target gene = light orange,  
667 likely to affect binding = dark orange) and ENSEMBL's variant effect predictor (missense variant



668 = light blue, potential regulatory effect = purple). Lower part of the panel displays gene models  
 669 for protein coding genes in the haplotype region (coordinates are displayed at the bottom of the  
 670 panel). **(C)** Frequency distribution of *rs2066807* (dark blue) in 1,000 genomes populations and  
 671 SGDP Papuans. **(D)** Illustration of putative regulatory mechanism for candidate region with a  
 672 cis-eQTL link of candidate aSNPs to *STAT2* and a trans-eQTL link for the same aSNPs to *IFI16*  
 673 - a predicted target of *STAT2*. **(E)** Effect sizes with 95% confidence intervals for significant cis-  
 674 eQTLs (FDR<0.05) between trans-eQTL candidate aSNPs and *STAT2* in GTEx tissues (y-axis,  
 675 effect size shown in the form of slope estimates) and eQTLGen blood (effect size shown as Z-  
 676 score). **(F)** Manhattan plot displaying association P values ( $-\log_{10}$ -transformed, y-axis) with  
 677 height (UK Biobank) of SNPs in and around the haplotype region. Candidate aSNPs are shown  
 678 in pink and other aSNPs in light blue.  
 679  
 680

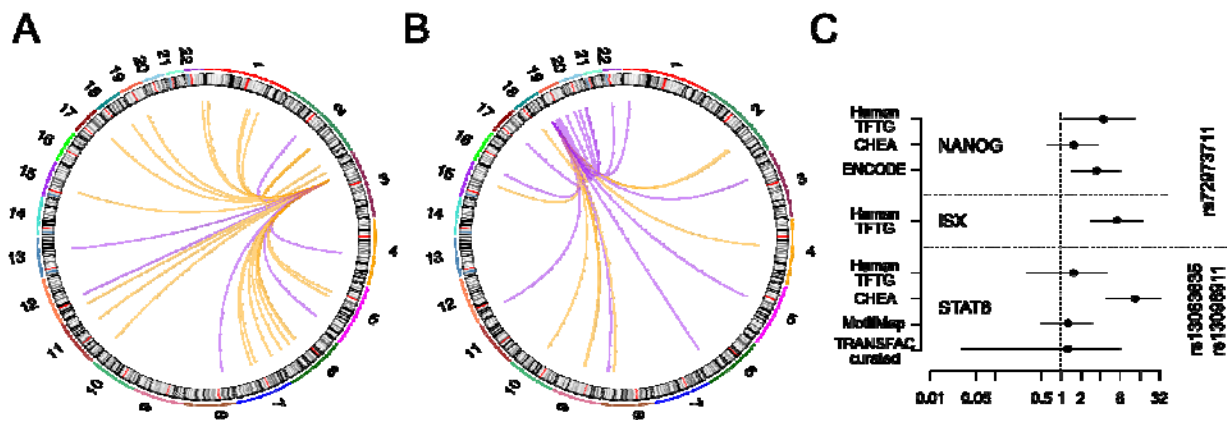

681  
 682  
 683 **Figure 2: Transcription factors with target genes that significantly overlap with two aSNP**  
 684 **trans-eQTL gene sets**  
 685 Circo plots for two hub trans-eQTL aSNP loci [(**A**) *rs13063635/rs13098911*; (**B**) *rs72973711*]  
 686 displaying the chromosomal links between trans-eQTL aSNPs and trans-eQTL genes. Genes  
 687 with both a higher and lower expression in the presence of the archaic allele are shown in  
 688 orange and purple, respectively. **(C)** Odds ratios with 95% confidence intervals representing the  
 689 proportional overlap of trans-eQTL genes for **(A, B)** and sets of transcription factor target genes  
 690 are displayed.

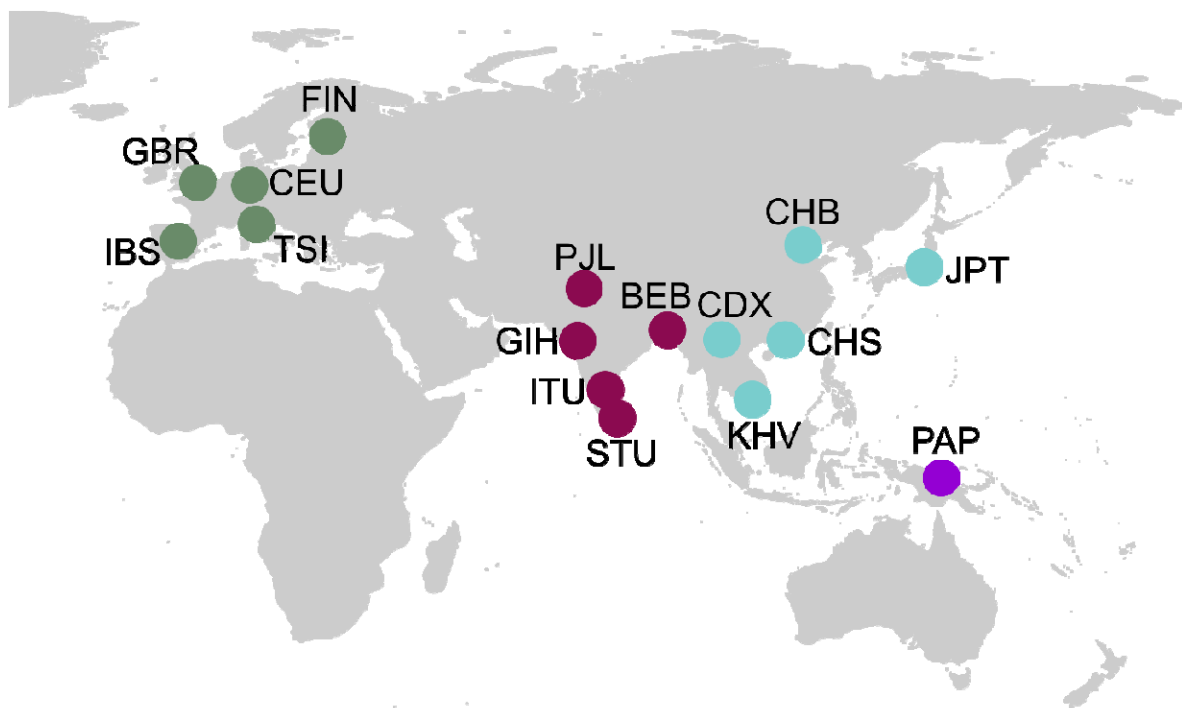

Neandertal allele frequency

Frequency quantile

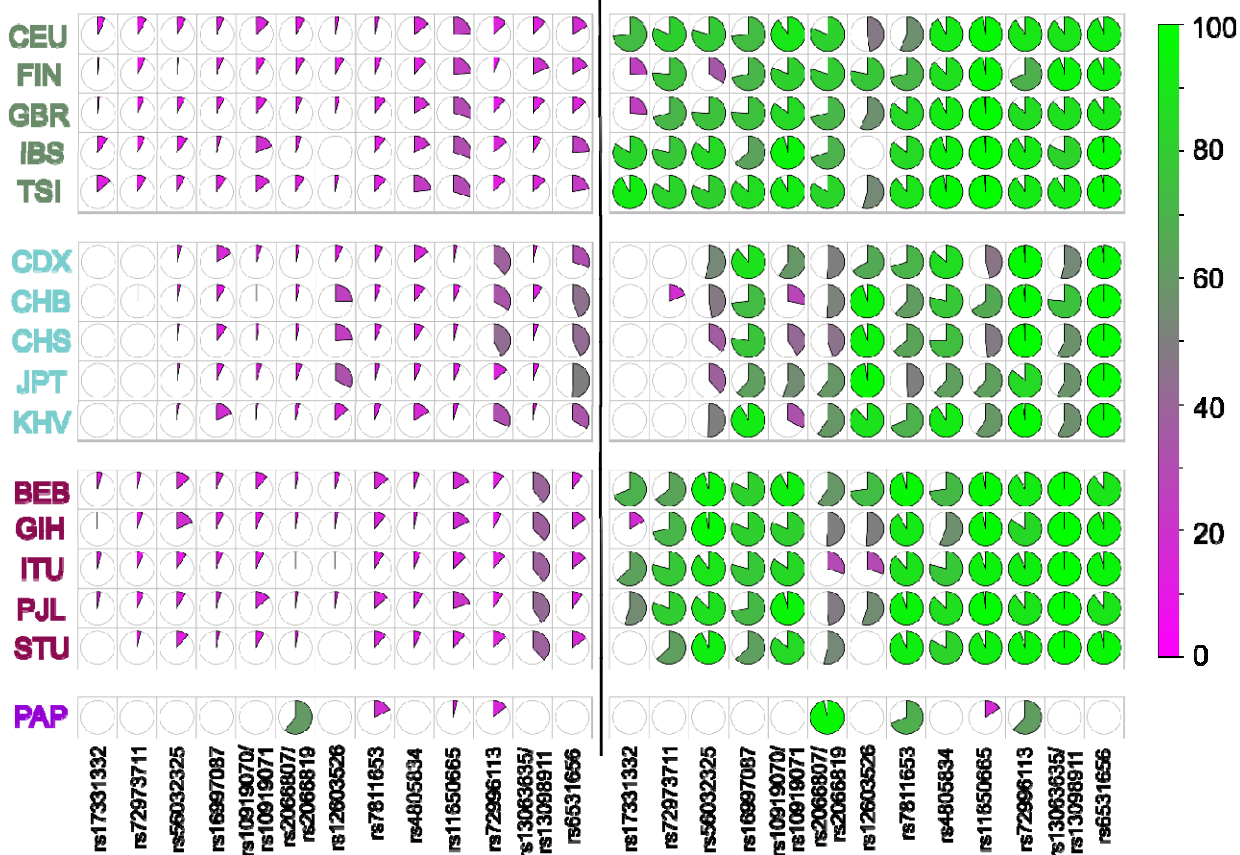

692 **Figure 3: The frequency of trans-eQTL aSNPs in Eurasian populations**

693 Pie charts illustrating the frequencies (lower panel, left) and quantiles among all aSNPs in a  
694 given population (lower panel, right) for 13 trans-eQTL aSNPs (x axis) in 15 Eurasian 1,000  
695 Genomes populations and Papuans from the Simons Genome Diversity Project (geographic  
696 distribution of populations shown in upper panel). Pie charts are color-coded based on  
697 frequency and quantile values.

698  
699

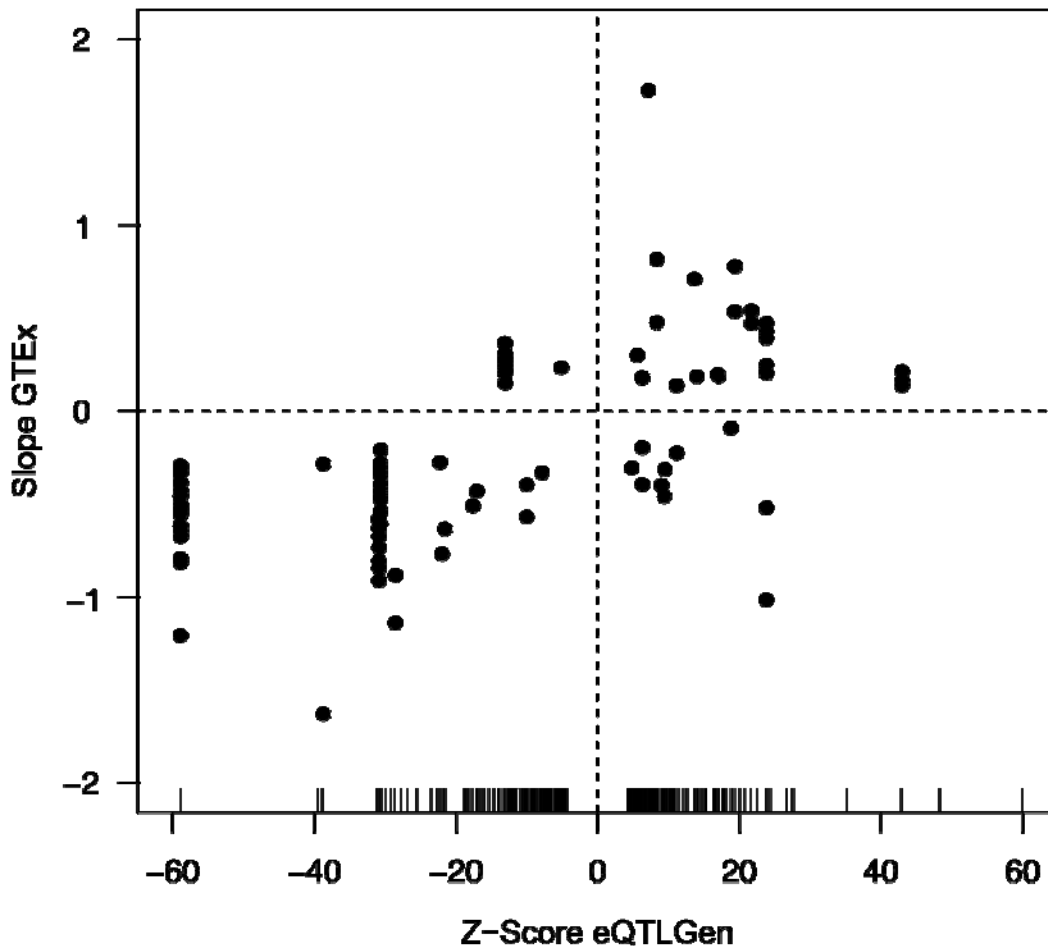

700

701 **Figure 4: Correlation between directional effects between GTEX and eQTLGen cTFs**

702 Scatterplot showing correlation (Spearman's  $\rho=0.66$ ;  $P = 1.3 \times 10^{-13}$ ) between directional  
703 summary statistics for transcription factors with a significant ( $FDR < 0.05$ ) aSNP cis-eQTL in both  
704 eQTLGen (Z-scores, x axis) and GTEX (slopes, y axis). Bars at the x-axis indicate eQTLGen Z-  
705 scores for significant cis-eQTLs (FDR) that are linked to aSNPs and TFs.

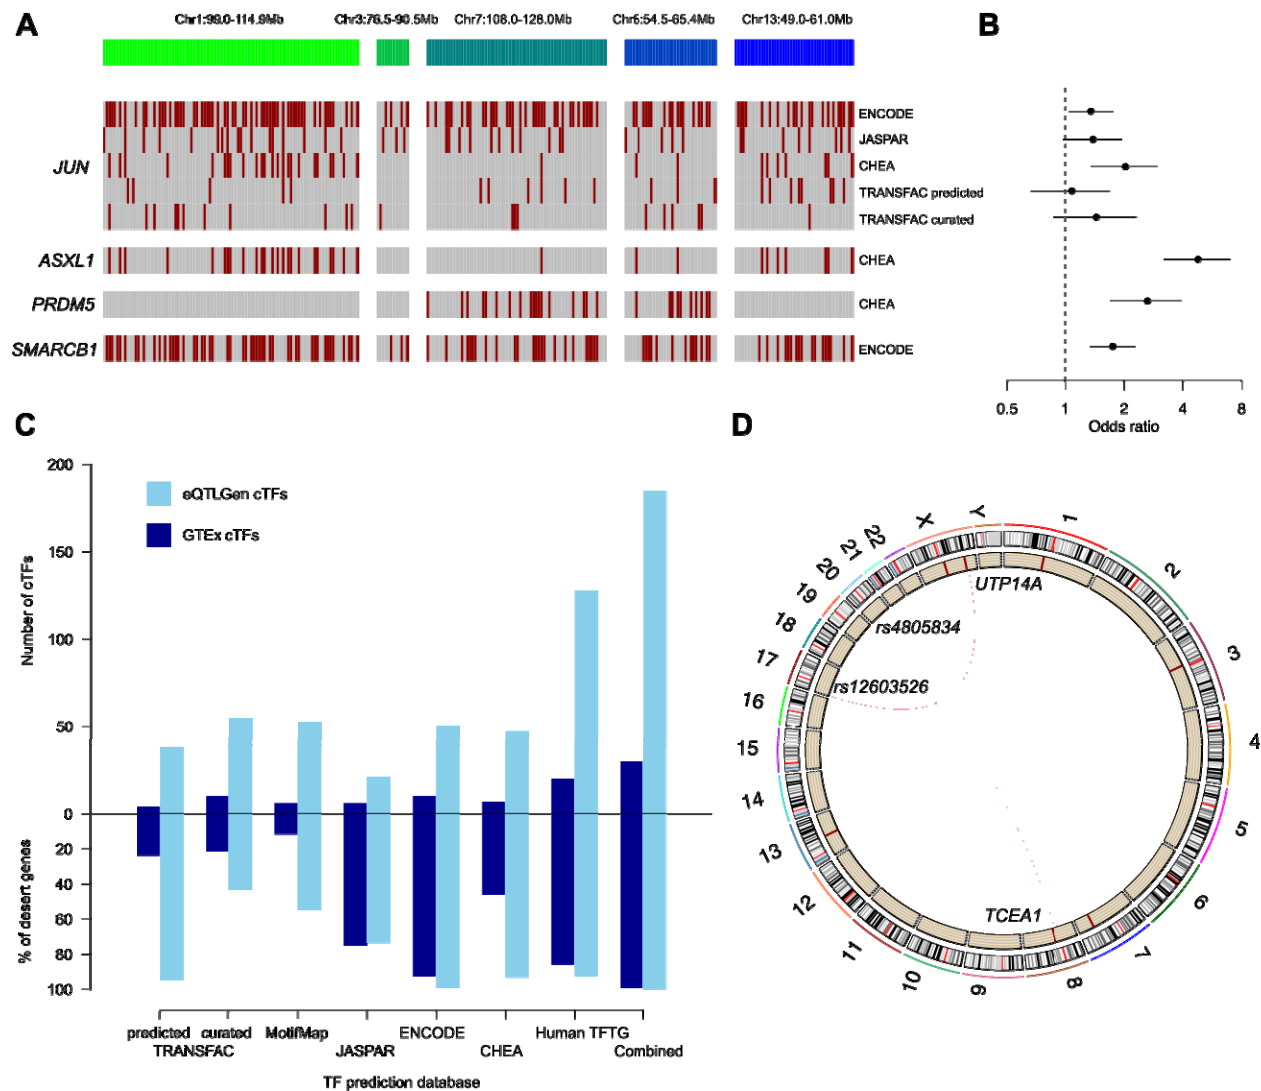

706  
 707

### Figure 5: The regulatory impact of Neandertal DNA on archaic deserts

708

**(A)** Predicted TF target genes for four cTFs (*JUN*, *ASXL1*, *PRDM5*, *SMARCB1*) with an over-

709

proportional overlap with genes within autosomal archaic deserts. Each tile represents a desert

710

gene (aligned in chromosomal order) and predicted targets for a given database are colored in

711

red. **(B)** Odds ratios with 95% confidence intervals representing the proportional overlap

712

between genes in archaic deserts and target genes for a given cTF and prediction database, as

713

displayed in **(A)** are shown. **(C)** For each TF target gene database, the number of cTFs (light

714

blue: eQTLGen; dark blue: GTEx) with prediction information (upper part) and the proportion of

715

predicted archaic desert genes (lower part) is displayed. **(D)** Circo plot showing the connection

716

between genomic coordinates for two Neandertal trans-eQTL aSNPs and their predicted desert

717

target genes. Archaic deserts are highlighted in the inner band in red.

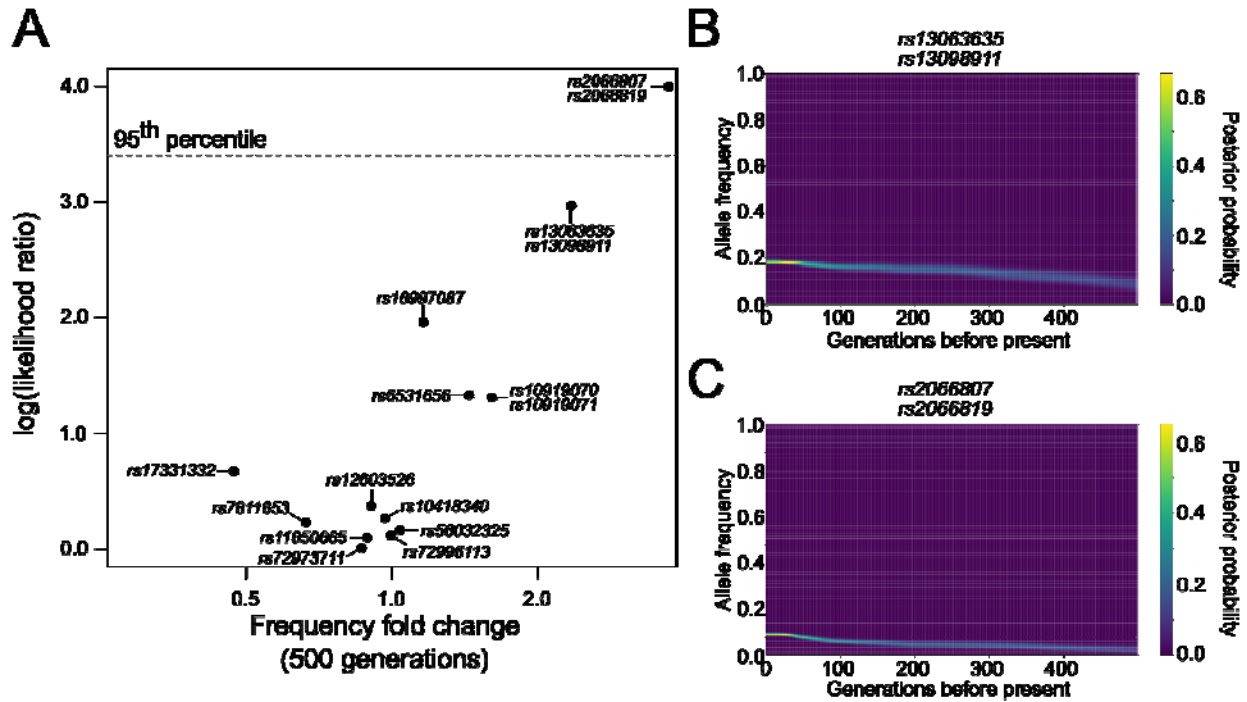

718

719 **Figure 6: Frequency trajectory estimates for trans-eQTL associated aSNPs**

720 **(A)** For each significant trans-eQTL aSNP locus the average frequency change in the Estonian  
721 population over the last 500 generations (x-axis) and the corresponding average log likelihood  
722 ratio (y axis) based on two runs of CLUES are displayed. The 95<sup>th</sup> percentile of the logLR  
723 distribution of eQTLGen trans-eQTLs is shown as a dotted line. **(B-C)** The estimated posterior  
724 probability for the Neandertal allele frequency for two trans-eQTL aSNP candidates over the last  
725 500 generations in the Estonian population are shown.

726 Acknowledgments

727 We would like to thank Mayukh Mondal for his comments on the manuscript. Figure 1D was  
728 generated using Biorender.com. Some of the analyses were carried out with the facilities of the  
729 High-Performance Computing Center of the University of Tartu.

730 Funding

731 D.Y., V.P. and M.D. were supported by the European Union through Horizon 2020 Research  
732 and Innovation Program under Grant No. 810645 and the European Union through the  
733 European Regional Development Fund Project No. MOBEC008. U. V. was supported by the  
734 European Regional Development Fund, the Mobilitas Pluss program (MOBTP108) and through  
735 the Estonian Research Council grant PUT (PRG1291). B. Y. was supported by the European  
736 Union through the European Regional Development Fund (Project No. 2014-2020.4.01.15-  
737 0012) and the European Regional Development Fund (Project No. 2014-2020.4.01.16-0030).

738 Conflict of interest disclosure

739 The authors declare they have no conflict of interest relating to the content of this article.  
740 Michael Dannemann is a recommender for PCI Genomics.

741

742 Consortia

743 Estonian Biobank Research Team:

744 Andres Metspalu, Mari Nelis, Lili Milani, Reedik Mägi & Tõnu Esko

745 Data, script and code availability

746 Script and code availability

747 Code related to the analyses presented in this manuscript is available at:

- 748 • [https://github.com/SillySabertooth/Neandertal\\_trans-eQTLs](https://github.com/SillySabertooth/Neandertal_trans-eQTLs)
- 749 • <https://myersgroup.github.io/relate/>
- 750 • <https://github.com/35ajstern/clues>

751 Data availability:

752 *Summary statistics for eQTLs:*

- 753 • eQTLGen: <https://www.eqtlgen.org/>
- 754 • GTEx: <https://gtexportal.org/home/datasets>

755

756 *Transcription factor target prediction information:*

- 757 • <https://maayanlab.cloud/Harmonizome/dataset/>
- 758 • <http://tfbsdb.systemsbio.net/download>

759

760 *GWAS summary statistics:*

- 761 • Immunobase: <https://genetics.opentargets.org/immunobase>
- 762 • GWAS catalog: <https://www.ebi.ac.uk/gwas/>

763

764 *Molecular effects predictions*

- 765 • VEP: <https://www.ensembl.org/info/docs/tools/vep/index.html>
- 766 • RegulomeDB: <https://regulomedb.org/>

767

768 *Genotype data*

- 769 • Neandertal and Denisovan genomes: <http://ftp.eva.mpg.de/neandertal/> and
- 770 <http://ftp.eva.mpg.de/denisova>
- 771 • 1,000 Genomes: <http://ftp.1000genomes.ebi.ac.uk/vol1/ftp/>
- 772 • Simons Genome Diversity Project:
- 773 <https://www.simonsfoundation.org/simons-genome-diversity-project/>, respectively
- 774 • Estonia Biobank WGS: <https://genomics.ut.ee/en/access-biobank> (Estonian Biobank
- 775 ethics approval number nr 1.1-12/2859)

776 Supplementary information

777 Tables

778 **Table S1: Predicted molecular effects (VEP) for trans-eQTL associated aSNPs with**  
779 **predicted consequences on gene expression regulation and modification of the protein**  
780 **sequence.**

781

782 **Table S2: Predicted regulatory potential (RegulomeDB) for trans-eQTL associated aSNPs**  
783 **with likely binding effects.**

784

785 **Table S3: MPRA regulatory information for trans-eQTL associated aSNPs with previous**  
786 **evidence for positive selection.**

787

788 **Table S4: MPRA regulatory information for trans-eQTL associated aSNPs overlapping a**  
789 **severe Covid-19 phenotype risk locus.**

790

791 **Table S5: Transcription factor target information.**

792

793 **Table S6: Significant phenotype associations for trans-eQTL associated aSNPs.**

794

795 **Table S7: GWAS summary statistics for GTEx cTF aSNPs.**

796

797 **Table S8: Summary statistics for significant trans-eQTLs associated with aSNPs in**  
798 **eQTLGen.**

799

800 **Table S9: Predicted trans-eQTL mechanism (Võsa & Claringbould et al.) for trans-eQTL**  
801 **aSNPs.**

802

803 **Table S10: Cis-eQTL summary statistics for transcription factors that co-localize with**  
804 **trans-eQTL-associated aSNPs.**

805

806 **Table S11: Summary statistics for aSNPs of cTFs in GTEx.**

807

808 **Table S12: Summary statistics for aSNPs of cTFs in eQTLGen.**



809

810 **Table S13: Overlap in available transcription factors with prediction information between**  
811 **databases.**

812

813 **Table S14: Frequency trajectory estimates for trans-eQTL aSNPs.**

814 Figures

815

816 **Figure S1: Sequence comparison between candidate haplotypes and genomes of**  
817 **Neandertals and Denisovan**

818 Histograms illustrating the sequence similarity of haplotypes in the 1,000 Genomes cohort with  
819 the genome sequence of the Altai (1) and Vindija (2) Neandertals and the Denisovan (3) for  
820 each trans-eQTL candidate genomic region (Methods and materials). Haplotypes carrying the  
821 archaic allele for a given trans-eQTL aSNP are colored in red and other haplotypes in blue.

## 822 References

- 823 1. Vernot B, Tucci S, Kelso J, Schraiber JG, Wolf AB, Gittelman RM, et al. Excavating  
824 Neandertal and Denisovan DNA from the genomes of Melanesian individuals. *Science*.  
825 2016;352:235–9.
- 826 2. Prüfer K, de Filippo C, Grote S, Mafessoni F, Korlević P, Hajdinjak M, et al. A high-coverage  
827 Neandertal genome from Vindija Cave in Croatia. *Science*. 2017;358:655–8.
- 828 3. Meyer M, Kircher M, Gansauge M-T, Li H, Racimo F, Mallick S, et al. A high-coverage  
829 genome sequence from an archaic Denisovan individual. *Science*. 2012;338:222–6.
- 830 4. Sankararaman S, Mallick S, Patterson N, Reich D. The Combined Landscape of Denisovan  
831 and Neanderthal Ancestry in Present-Day Humans. *Curr Biol*. 2016;26:1241–7.
- 832 5. Simonti CN, Vernot B, Bastarache L, Bottinger E, Carrell DS, Chisholm RL, et al. The  
833 phenotypic legacy of admixture between modern humans and Neandertals. *Science*.  
834 2016;351:737–41.
- 835 6. Dannemann M, Kelso J. The Contribution of Neanderthals to Phenotypic Variation in Modern  
836 Humans. *Am J Hum Genet*. 2017;101:578–89.
- 837 7. McArthur E, Rinker DC, Capra JA. Quantifying the contribution of Neanderthal introgression  
838 to the heritability of complex traits. *Nat Commun*. 2021;12:4481.
- 839 8. Quach H, Rotival M, Pothlichet J, Loh Y-HE, Dannemann M, Zidane N, et al. Genetic  
840 Adaptation and Neandertal Admixture Shaped the Immune System of Human Populations. *Cell*.  
841 2016;167:643–56.e17.
- 842 9. Gittelman RM, Schraiber JG, Vernot B, Mikacenic C, Wurfel MM, Akey JM. Archaic Hominin  
843 Admixture Facilitated Adaptation to Out-of-Africa Environments. *Curr Biol*. 2016;26:3375–82.
- 844 10. Dannemann M, Racimo F. Something old, something borrowed: admixture and adaptation in  
845 human evolution. *Curr Opin Genet Dev*. 2018;53:1–8.
- 846 11. Dannemann M, Prüfer K, Kelso J. Functional implications of Neandertal introgression in  
847 modern humans. *Genome Biology*. 2017;18(1):61.
- 848 12. McCoy RC, Wakefield J, Akey JM. Impacts of Neanderthal-Introgressed Sequences on the

- 849 Landscape of Human Gene Expression. *Cell*. 2017;168:916–27.e12.
- 850 13. Silvert M, Quintana-Murci L, Rotival M. Impact and Evolutionary Determinants of  
851 Neanderthal Introgression on Transcriptional and Post-Transcriptional Regulation. *Am J Hum*  
852 *Genet*. 2019;104:1241–50.
- 853 14. Vespasiani DM, Jacobs GS, Brucato N, Cox MP, Romero IG. Denisovan introgression has  
854 shaped the immune system of present-day Papuans. *bioRxiv*. 2021.
- 855 15. Petr M, Pääbo S, Kelso J, Vernot B. Limits of long-term selection against Neandertal  
856 introgression. *Proc Natl Acad Sci U S A*. 2019;116:1639–44.
- 857 16. Telis N, Aguilar R, Harris K. Selection against archaic hominin genetic variation in regulatory  
858 regions. *Nat Ecol Evol*. 2020;4:1558–66.
- 859 17. Yao DW, O'Connor LJ, Price AL, Gusev A. Quantifying genetic effects on disease mediated  
860 by assayed gene expression levels. *Nat Genet*. 2020;52:626–33.
- 861 18. Ouwens KG, Jansen R, Nivard MG, van Dongen J, Frieser MJ, Hottenga J-J, et al. A  
862 characterization of cis- and trans-heritability of RNA-Seq-based gene expression. *Eur J Hum*  
863 *Genet*. 2020;28:253–63.
- 864 19. Rao SSP, Huntley MH, Durand NC, Stamenova EK, Bochkov ID, Robinson JT, et al. A 3D  
865 map of the human genome at kilobase resolution reveals principles of chromatin looping. *Cell*.  
866 2014;159:1665–80.
- 867 20. Marbach D, Lamparter D, Quon G, Kellis M, Kutalik Z, Bergmann S. Tissue-specific  
868 regulatory circuits reveal variable modular perturbations across complex diseases. *Nat*  
869 *Methods*. 2016;13:366–70.
- 870 21. Boyle EA, Li YI, Pritchard JK. An Expanded View of Complex Traits: From Polygenic to  
871 Omnigenic. *Cell*. 2017;169:1177–86.
- 872 22. Consortium TG, The GTEx Consortium. The GTEx Consortium atlas of genetic regulatory  
873 effects across human tissues. *Science*. 2020;369(6509):1318-1330.
- 874 23. Võsa U, Claringbould A, Westra H-J, Bonder MJ, Deelen P, Zeng B, et al. Large-scale cis-  
875 and trans-eQTL analyses identify thousands of genetic loci and polygenic scores that regulate  
876 blood gene expression. *Nat Genet*. 2021;53:1300–10.

- 877 24. Dannemann M. The Population-Specific Impact of Neandertal Introgression on Human  
878 Disease. *Genome Biol Evol.* 2021;13(1):evaa250
- 879 25. 1000 Genomes Project Consortium, Auton A, Brooks LD, Durbin RM, Garrison EP, Kang  
880 HM, et al. A global reference for human genetic variation. *Nature.* 2015;526:68–74.
- 881 26. Prüfer K, Racimo F, Patterson N, Jay F, Sankararaman S, Sawyer S, et al. The complete  
882 genome sequence of a Neanderthal from the Altai Mountains. *Nature.* 2014;505:43–9.
- 883 27. Mallick S, Li H, Lipson M, Mathieson I, Gymrek M, Racimo F, et al. The Simons Genome  
884 Diversity Project: 300 genomes from 142 diverse populations. *Nature.* 2016;538:201–6.
- 885 28. Boyle AP, Hong EL, Hariharan M, Cheng Y, Schaub MA, Kasowski M, et al. Annotation of  
886 functional variation in personal genomes using RegulomeDB. *Genome Res.* 2012;22:1790–7.
- 887 29. McLaren W, Gil L, Hunt SE, Riat HS, Ritchie GRS, Thormann A, et al. The Ensembl Variant  
888 Effect Predictor. *Genome Biol.* 2016;17:122.
- 889 30. Jagoda E, Marnetto D, Montinaro F, Richard D, Pagani L, Capellini TD. Regulatory  
890 dissection of the severe COVID-19 risk locus introgressed by Neanderthals. *bioRxiv.* 2021
- 891 31. Jagoda E, Xue JR, Reilly SK, Dannemann M, Racimo F, Huerta-Sanchez E, et al. Detection  
892 of Neanderthal Adaptively Introgressed Genetic Variants that Modulate Reporter Gene  
893 Expression in Human Immune Cells. *Mol Biol Evol.* 2021;msab304
- 894 32. Xie X, Rigor P, Baldi P. MotifMap: a human genome-wide map of candidate regulatory motif  
895 sites. *Bioinformatics.* 2009;25(2):167-74.
- 896 33. Causal Mechanistic Regulatory Network for Glioblastoma Deciphered Using Systems  
897 Genetics Network Analysis. *Cell Systems.* Cell Press; 2016;3:172–86.
- 898 34. Mathelier A, Zhao X, Zhang AW, Parcy F, Worsley-Hunt R, Arenillas DJ, et al. JASPAR  
899 2014: an extensively expanded and updated open-access database of transcription factor  
900 binding profiles. *Nucleic Acids Res.* 2014;42(Database issue):D142-7.
- 901 35. Matys V, Kel-Margoulis OV, Fricke E, Liebich I, Land S, Barre-Dirrie A, et al. TRANSFAC  
902 and its module TRANSCompel: transcriptional gene regulation in eukaryotes. *Nucleic Acids*  
903 *Res.* 2006;34:D108-10.

- 904 36. A user's guide to the encyclopedia of DNA elements (ENCODE). *PLoS Biol.*  
905 2011;9(4):e1001046
- 906 37. Lachmann A, Xu H, Krishnan J, Berger SI, Mazloom AR, Ma'ayan A. ChEA: transcription  
907 factor regulation inferred from integrating genome-wide CHIP-X experiments. *Bioinformatics.*  
908 2010;26(19)2438–2444.
- 909 38. Hu H, Miao Y-R, Jia L-H, Yu Q-Y, Zhang Q, Guo A-Y. AnimalTFDB 3.0: a comprehensive  
910 resource for annotation and prediction of animal transcription factors. *Nucleic Acids Res. Oxford*  
911 *Academic*; 2018;47:D33–8.
- 912 39. MacArthur J, Bowler E, Cerezo M, Gil L, Hall P, Hastings E, et al. The new NHGRI-EBI  
913 Catalog of published genome-wide association studies (GWAS Catalog). *Nucleic Acids Res.*  
914 2017;45:D896–901.
- 915 40. Astle WJ, Elding H, Jiang T, Allen D, Ruklisa D, Mann AL, et al. The Allelic Landscape of  
916 Human Blood Cell Trait Variation and Links to Common Complex Disease. *Cell.*  
917 2016;167:1415–29.e19.
- 918 41. Stern AJ, Wilton PR, Nielsen R. An approximate full-likelihood method for inferring selection  
919 and allele frequency trajectories from DNA sequence data. *PLoS Genet.* 2019;15:e1008384.
- 920 42. Marnetto D, Pankratov V, Mondal M, Montinaro F, Pärna K, Vallini L, et al. Ancestral  
921 contributions to contemporary European complex traits. *bioRxiv.* 2021
- 922 43. Speidel L, Forest M, Shi S, Myers SR. A method for genome-wide genealogy estimation for  
923 thousands of samples. *Nat Genet.* 2019;51:1321–9.
- 924 44. Kals M, Nikopensius T, Läll K, Pärn K, Sikka TT, Suvisaari J, et al. Advantages of genotype  
925 imputation with ethnically matched reference panel for rare variant association analyses.  
926 *bioRxiv.* 2019
- 927 45. Pankratov V, Montinaro F, Kushniarevich A, Hudjashov G, Jay F, Saag L, et al. Differences  
928 in local population history at the finest level: the case of the Estonian population. *Eur J Hum*  
929 *Genet. Nature Publishing Group*; 2020;28:1580–91.
- 930 46. Qin P, Stoneking M. Denisovan Ancestry in East Eurasian and Native American  
931 Populations. *Mol Biol Evol.* 2015;32:2665–74.

- 932 47. Battle A, Montgomery SB. Determining causality and consequence of expression  
933 quantitative trait loci. *Hum Genet.* 2014;133:727–35.
- 934 48. Sankararaman S, Patterson N, Li H, Pääbo S, Reich D. The date of interbreeding between  
935 Neandertals and modern humans. *PLoS Genet.* 2012;8:e1002947.
- 936 49. Deng HK, Unutmaz D, KewalRamani VN, Littman DR. Expression cloning of new receptors  
937 used by simian and human immunodeficiency viruses. *Nature.* 1997;388:296–300.
- 938 50. Ugucioni M, Mackay CR, Ochensberger B, Loetscher P, Rhis S, LaRosa GJ, et al. High  
939 expression of the chemokine receptor CCR3 in human blood basophils. Role in activation by  
940 eotaxin, MCP-4, and other chemokines. *J Clin Invest.* 1997;100:1137–43.
- 941 51. Peyrégne S, Boyle MJ, Dannemann M, Prüfer K. Detecting ancient positive selection in  
942 humans using extended lineage sorting. *Genome Res.* 2017;27:1563–72.
- 943 52. Maricic T, Günther V, Georgiev O, Gehre S, Culin M, Schreiweis C, et al. A recent  
944 evolutionary change affects a regulatory element in the human FOXP2 gene. *Mol Biol Evol.*  
945 2013;30:844–52.
- 946 53. Zeberg H, Pääbo S. The major genetic risk factor for severe COVID-19 is inherited from  
947 Neanderthals. *Nature.* 2020;587:610–2.
- 948 54. Caio G, Volta U, Sapone A, Leffler DA, De Giorgio R, Catassi C, et al. Celiac disease: a  
949 comprehensive current review. *BMC Med.* 2019;17:142.
- 950 55. Mendez FL, Watkins JC, Hammer MF. A haplotype at STAT2 Introgressed from  
951 neanderthals and serves as a candidate of positive selection in Papua New Guinea. *Am J Hum*  
952 *Genet.* 2012;91:265–74.
- 953 56. Venner SJ. A New Estimate for Neanderthal Energy Expenditure. 2018.
- 954 57. Dannemann M, Milaneschi Y, Yermakovich D, Stiglbauer V, Friese MA, Otte C, et al.  
955 Neandertal introgression dissects the genetic landscape of neuropsychiatric disorders and  
956 associated behavioral phenotypes. *medRxiv.* 2021.
- 957 58. Jayaram N, Usvyat D, R Martin AC. Evaluating tools for transcription factor binding site  
958 prediction. *BMC Bioinformatics.* 2016;17:547.

- 959 59. Barker HR, Parkkila S, Tolvanen MEE. Evolution is in the details: Regulatory differences in  
960 modern human and Neanderthal. bioRxiv. 2020.
- 961 60. Findley AS, Zhang X, Boye C, Lin YL, Kalita CA, Barreiro L, et al. A signature of  
962 Neanderthal introgression on molecular mechanisms of environmental responses. bioRxiv.  
963 2021.
- 964 61. Quintana-Murci L. Human Immunology through the Lens of Evolutionary Genetics. Cell. Cell  
965 Press; 2019;177:184–99.
